1 **Arbovirus emergence in temperate climates: the case of Córdoba, Argentina, 2009-2018**

2  
3 Michael A. Robert<sup>1</sup>, Daniela Tatiana Tinunin<sup>2</sup>, Elisabet Marina Benitez<sup>2</sup>, Francisco  
4 Ludueña-Almeida<sup>2,3</sup>, Moory Romero<sup>4</sup>, Anna M. Stewart-Ibarra<sup>4,5</sup>, Elizabet Lilia Estallo<sup>2,\*</sup>

- 5  
6 1. Department of Mathematics, Physics, and Statistics, University of the Sciences, Philadelphia, PA  
7 2. Instituto de Investigaciones Biológicas y Tecnológicas (IIBYT) CONICET- Universidad Nacional de Córdoba.  
8 Centro de Investigaciones Entomológicas de Córdoba. Facultad de Ciencias Exactas, Físicas y Naturales,  
9 Universidad Nacional de Córdoba. Av. Vélez Sarsfield 1611. CP (X5016GCA). Ciudad Universitaria, Córdoba  
10 Capital, Argentina.  
11 3. Cátedra de Matemática (Cs. Biológicas). Facultad de Ciencias Exactas, Físicas y Naturales, Universidad Nacional  
12 de Córdoba. Av. Vélez Sarsfield 1611. CP (X5016GCA). Ciudad Universitaria, Córdoba Capital, Argentina  
13 4. Institute for Global Health & Translational Sciences, SUNY Upstate Medical University, Syracuse, NY, USA  
14 5. Department of Medicine, SUNY Upstate Medical University, Syracuse, NY, USA

15 \*Corresponding author: Elizabet L. Estallo, [eelizabet@gmail.com](mailto:eelizabet@gmail.com)  
16 Universidad Nacional de Córdoba.  
17 Av. Vélez Sarsfield 1611. CP (X5016GCA).  
18 Ciudad Universitaria, Córdoba Capital, Argentina.  
19 +54 3515353800

20 Keywords: *Aedes aegypti*, dengue, Zika virus, chikungunya, *Aedes albopictus*, emerging  
21 infectious diseases

22 Running Head: Arbovirus Emergence in Córdoba, Argentina, 2009-2018

23 Abstract: 130 Words

24 Main Text: Words: 1407

25 Figures: 2

Tables: 1

Supplementary Material: 1 Table

26 **Abstract.**

27           The distribution of arbovirus disease transmission is expanding from the tropics and  
28 subtropics into temperate regions worldwide. The aim of this study was to characterize the  
29 emergence of arboviruses in the temperate city of Córdoba, Argentina (2009-2018), including  
30 dengue virus (DENV) serotypes and origins of imported cases. The first cases of dengue fever  
31 were reported in 2009, followed by outbreaks in 2013, 2015, and 2016, each outbreak having  
32 greater incidence than the previous. DENV1 was the predominant serotype. Cases were imported  
33 from Venezuela, Brazil, Bolivia, Mexico, Costa Rica, and northern Argentina. The first imported  
34 cases of chikungunya were reported in 2014 and the first imported and autochthonous of Zika  
35 fever in 2016. Regional efforts are needed to strengthen surveillance, due to the key role of  
36 human movement in arbovirus introductions.

37

38 **Background**

39           Dengue fever re-emerged in Latin America and the Caribbean in the 1980s, following the  
40 decline of widespread *Aedes aegypti* mosquito control programs aimed at eliminating Yellow  
41 Fever<sup>1</sup>. Dengue fever is caused by dengue virus (DENV serotypes 1-4), which causes a spectrum  
42 of acute febrile illness<sup>2</sup>. In Argentina, dengue was reported for the first time in over 80 years in  
43 the northwestern Province of Salta in 1997, and has since been largely constrained to northern  
44 provinces of the country with subtropical climates<sup>3,4</sup>.

45           Within the last decade, dengue emerged for the first time in areas with temperate  
46 climates, including Córdoba, the second largest city in Argentina (population 1.3 million),  
47 located in the southern cone of South America (Figure 1). The first dengue outbreak in Córdoba  
48 occurred in 2009<sup>5</sup>, fourteen years after *Ae. aegypti* was first detected in the city<sup>6</sup>. Since that time,

49 Córdoba has reported imported and autochthonous cases of *Aedes*-transmitted arboviruses most  
50 years; however, no prior studies have characterized the local epidemiological situation. Córdoba  
51 (31.4°S, 64.2°W) is among the southernmost cities in the Western Hemisphere to report  
52 autochthonous dengue transmission, making it an important site to study the dynamics of  
53 emergence of arboviruses in southern temperate latitudes.

54 Córdoba has a continental temperate climate, with warm summers (October – May, mean  
55 max temp = 25.1°C) and dry, cool winters (June – September, mean min temp =12.5°C).  
56 Summer temperatures fall within the lower range of optimal temperatures for arbovirus  
57 transmission by *Aedes aegypti*, which peak at 28.5°C (range: 13.5°C-34.2°C)<sup>7</sup>. The Ministry of  
58 Health (MoH) has reported no vector activity during winter months; therefore, local outbreaks  
59 depend on the importation of arboviruses, often by travelers from disease endemic areas.

60 The aim of this study was to present the epidemiological characteristics of the emergence  
61 of dengue fever and other arboviral diseases (i.e., chikungunya and Zika fever) in Córdoba over  
62 the last decade. We obtained epidemiological data by manually extracting records from weekly  
63 reports published in Spanish by the Argentinian MoH<sup>8</sup>. We translated, compiled, and reviewed  
64 the data to determine weekly cases, source of imported cases, and DENV serotypes in  
65 circulation. In Córdoba, epidemiological and vector surveillance are the responsibilities of the  
66 Epidemiology Area of the Zoonosis Program of the MoH of the province (M. Ainete, *pers.*  
67 *comm.*). Suspected dengue infections that are diagnosed at either private or public clinical sites  
68 are reported to the National Health Surveillance System operated by the MoH. A subset of  
69 clinically diagnosed cases are confirmed by laboratory diagnostics (polymerase chain reaction  
70 and immunoglobulin M antibodies to DENV) at the central MoH laboratory in Córdoba. A subset

71 of samples are sent to the Maiztegui Institute in Buenos Aires for confirmation using the plaque  
72 reduction neutralization test (PRNT).

73 We consolidated all reported cases of dengue, Zika, and chikungunya for Córdoba city  
74 between January 2009 and June 2018 (114 weekly reports). We cleaned the data when  
75 inconsistencies were noted (e.g., eliminating cases that appeared to be counted multiple times).  
76 We aimed to collect all available data on arbovirus cases including probable (clinically  
77 diagnosed) and laboratory confirmed cases, autochthonous (locally transmitted) and imported  
78 cases (illness in someone with a travel history), DENV serotypes, and origins of imported cases.  
79 However, this information was not available in all reports. The cases presented here are a sum of  
80 probable and confirmed cases unless otherwise noted. Herein, we present a synthesis of  
81 arbovirus transmission in Córdoba city since 2009, and focus on the characteristics of the four  
82 major outbreaks of dengue that occurred between 2009 and 2018.

83

#### 84 **Arbovirus outbreaks**

85 In Figure 2, we present weekly incidence of cases from January 2009 to June 2018. A  
86 total of 1,429 dengue cases were reported during this period (1,170 autochthonous, 259  
87 imported). DENV1 was the predominant serotype in circulation over the last decade, and  
88 DENV4 played a secondary role, although all four DENV serotypes were detected (Table 1).  
89 Imported dengue cases originated from tropical countries where dengue fever is endemic, as well  
90 as the endemic subtropical northern region of Argentina.

91 The first imported dengue case in Córdoba was reported Epidemiological Week (EW) 2  
92 in 2009. In EW10, 2 cases of dengue in patients without travel to affected areas were confirmed,  
93 marking the first known autochthonous dengue case in Córdoba. In total, 88 autochthonous cases

94 were reported between EW10-EW18. During EW2-EW18, 42 imported dengue cases were  
95 reported, leading to 130 total cases. All tested cases were confirmed to be DENV1<sup>9</sup>. The total  
96 dengue incidence in 2009 was 9.78 cases per 100,000 people.

97 In 2013, Córdoba experienced its second major outbreak, with 115 autochthonous and 10  
98 imported cases reported (total incidence 10.13). Autochthonous and imported cases were  
99 reported from EW7-18. The known origins of imported cases include Brazil, Bolivia, Mexico,  
100 Costa Rica, and Formosa Province in northeastern Argentina.

101 In 2015, Córdoba experienced its third significant outbreak of dengue beginning with  
102 imported cases in EW5. From EW9-22, 221 autochthonous cases were reported. In total, 236  
103 autochthonous and 14 imported dengue cases were reported (total incidence 19.01). DENV1 and  
104 DENV4 were detected, and cases were imported from Brazil and Formosa Province, Argentina.

105 Córdoba's largest dengue outbreak to date began in EW52 of 2015 with an imported case  
106 of unknown origin. The first 2 autochthonous cases were reported in EW2, and 687  
107 autochthonous and 134 imported cases were reported from EW2-24. In total, 822 cases of  
108 dengue were reported (688 autochthonous; 134 imported; total incidence 60.25). Of these, 288  
109 (35%) cases were tested for DENV serotypes (Table 1). DENV2, DENV3, and DENV4  
110 serotypes were detected in imported cases. Of the 284 DENV1 cases, 221 (78%) were  
111 autochthonous, and 63 (22%) were imported.

112 Chikungunya and Zika fever first emerged in Córdoba in 2014 and 2016, respectively  
113 (Table 1, Supplementary Material). A total of 22 imported chikungunya cases were reported  
114 from 2014 to 2017. In 2016, 4 imported and 1 autochthonous cases of Zika were reported. No  
115 cases of congenital Zika syndrome were detected.

116

## 117 **Discussion**

118           In the last decade, *Aedes*-transmitted arbovirus-related illness has emerged for the first  
119 time in the city of Córdoba. The city has quickly become a site of significant epidemic dengue  
120 transmission, as indicated by the occurrence of 4 outbreaks in less than 10 years, and local  
121 transmission most years since 2009. During outbreaks, cases peaked during the later part of the  
122 summer, when vector densities were elevated and maximum daily temperatures were slightly  
123 lower than the optimum temperature for arbovirus transmission by *Aedes aegypti* of 28.5°C<sup>7</sup>. The  
124 increase in arbovirus activity in Córdoba mirrors that of arbovirus activity across temperate  
125 regions of the world, including the southern United States and southern Europe<sup>9</sup>. Autochthonous  
126 cases of dengue re-emerged after many decades of no transmission in Florida, USA, in 2009<sup>10</sup>,  
127 and in France, Croatia, and Portugal in 2010-2013<sup>11</sup>. Increasing arbovirus transmission in  
128 temperate latitudes is likely associated with social and ecological factors including greater  
129 human movement, expansion and local adaptation of *Aedes* mosquitoes, and changes in climate  
130 resulting in increased surface temperatures and altered rainfall patterns<sup>12</sup>.

131           As Córdoba is a temperate region, local transmission depends on the importation of cases  
132 from dengue endemic areas. With the current political crisis in Venezuela, resulting in mass  
133 migration of people into Argentina, the risk of importation of dengue fever and other mosquito  
134 borne diseases (e.g., malaria) has increased<sup>13</sup>. Regional efforts are needed to strengthen  
135 surveillance of arbovirus transmission, due to the key role of human movement in dengue  
136 introductions, as shown here.

137           In response to the emergence of dengue fever, the MoH of Argentina has implemented a  
138 comprehensive *Ae. aegypti* surveillance program across Córdoba using larval surveys and  
139 ovitraps during the season of vector activity in cooperation with the Córdoba Entomological

140 Research Centre from the National University of Córdoba and the Institute of Biological  
141 Research (IIBYT). Vector control by the MoH is mostly focal, around homes with dengue cases,  
142 and includes control of adult mosquito populations (indoor and outdoor fumigation) and larval  
143 mosquitoes (*Bacillus thuringiensis israelensis* larvicide application, elimination of larval habitat)  
144 <sup>14</sup>. However, these efforts were unable to prevent outbreaks (as in 2016), and risk perception by  
145 the public remains low. Further investigation of the role of social and environmental drivers of  
146 arbovirus emergence in Córdoba is needed to develop effective vector control and disease  
147 management programs to reduce the burden of dengue illness.

148

#### 149 **Acknowledgements.**

150 This work was supported by grants awarded to A.M. Stewart-Ibarra and M.A. Robert by the  
151 United States Embassy in Argentina administered through the Fulbright Commission. ELE is a  
152 member of the Consejo de Investigaciones Científicas y Tecnológicas (CONICET) from  
153 Argentina.

154

155 **Table 1.** Dengue virus serotypes and origin of imported dengue cases. N is the number of cases  
156 in Córdoba that were tested for serotype each year.

157

| Year | DENV Serotypes Detected                                                  | Origins of Imported Cases                                               |
|------|--------------------------------------------------------------------------|-------------------------------------------------------------------------|
| 2009 | DENV-1 (Majority; N unknown)                                             | No Information                                                          |
| 2010 | No Information                                                           |                                                                         |
| 2011 | No Information                                                           |                                                                         |
| 2012 | DENV-1 (50%), DENV-4 (50%); (N=2)                                        | No Information                                                          |
| 2013 | DENV-1 (73.8%), DENV-2 (1.6%), DENV-3 (3.3%),<br>DENV-4 (21.3%); (N=61)  | Brazil, Bolivia, Mexico,<br>Costa Rica, Formosa<br>Province (Argentina) |
| 2014 | DENV-1 (100%); (N=2)                                                     | Venezuela                                                               |
| 2015 | DENV-1, DENV-4 (Frequency Unknown)                                       | Brazil, Formosa Province<br>(Argentina)                                 |
| 2016 | DENV-1 (98.6%), DENV-2 (0.4%), DENV-3 (0.4%),<br>DENV-4 (1.0%); (N=288). | No Information                                                          |
| 2017 | No Information                                                           |                                                                         |
| 2018 | DENV-1 (Majority; N Unknown)                                             | Colombia                                                                |

158

159

160

161

162



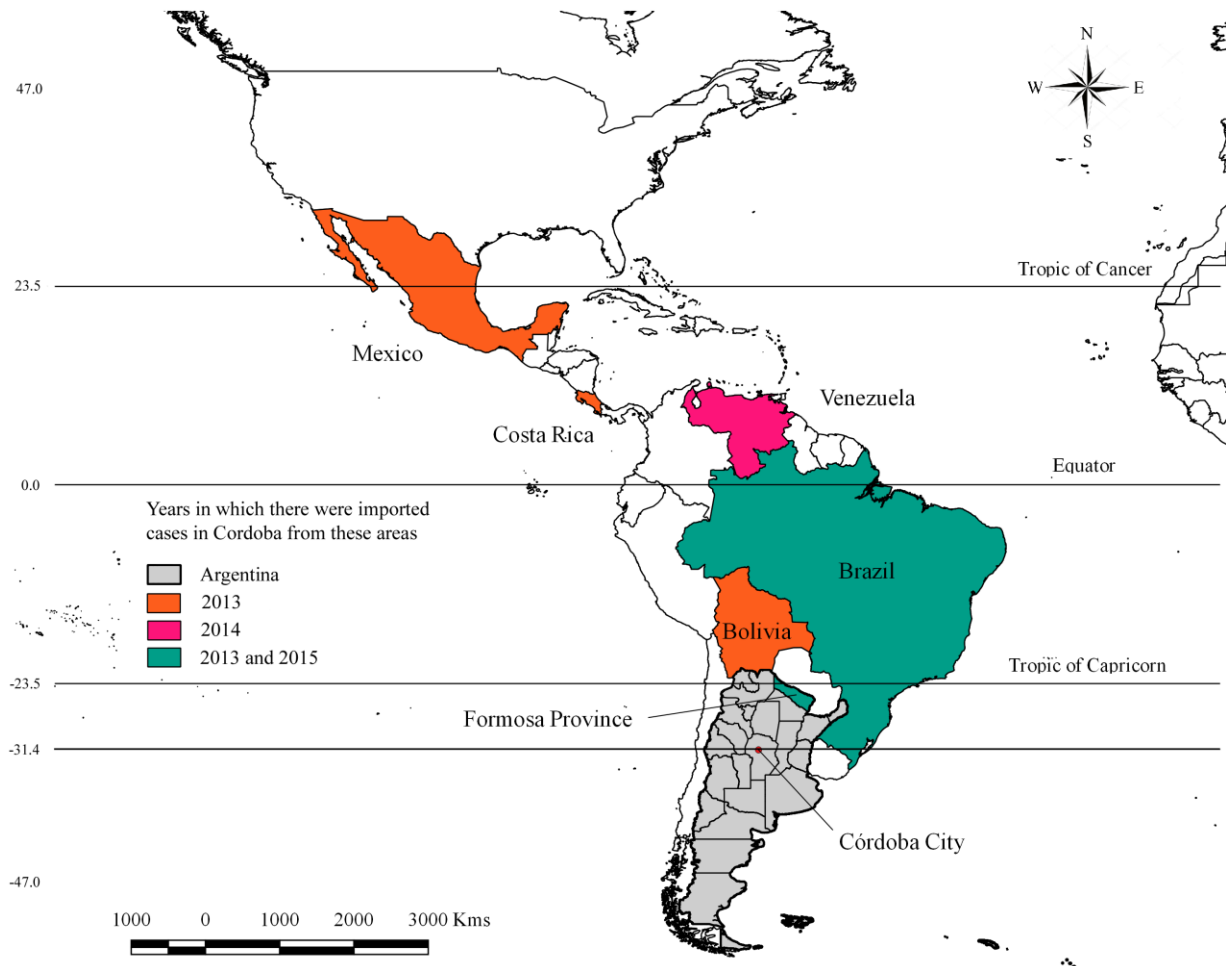

163

164 **Figure 1.** Location of Córdoba city within the province of Córdoba in Argentina. The orange,  
165 pink, and green highlighted countries are countries from which at least one dengue case was  
166 known to have been imported. Origins of imports were unknown for the majority of dengue  
167 cases reported. Lines of latitude are shown to emphasize the location of Córdoba city in  
168 relationship to the tropics.

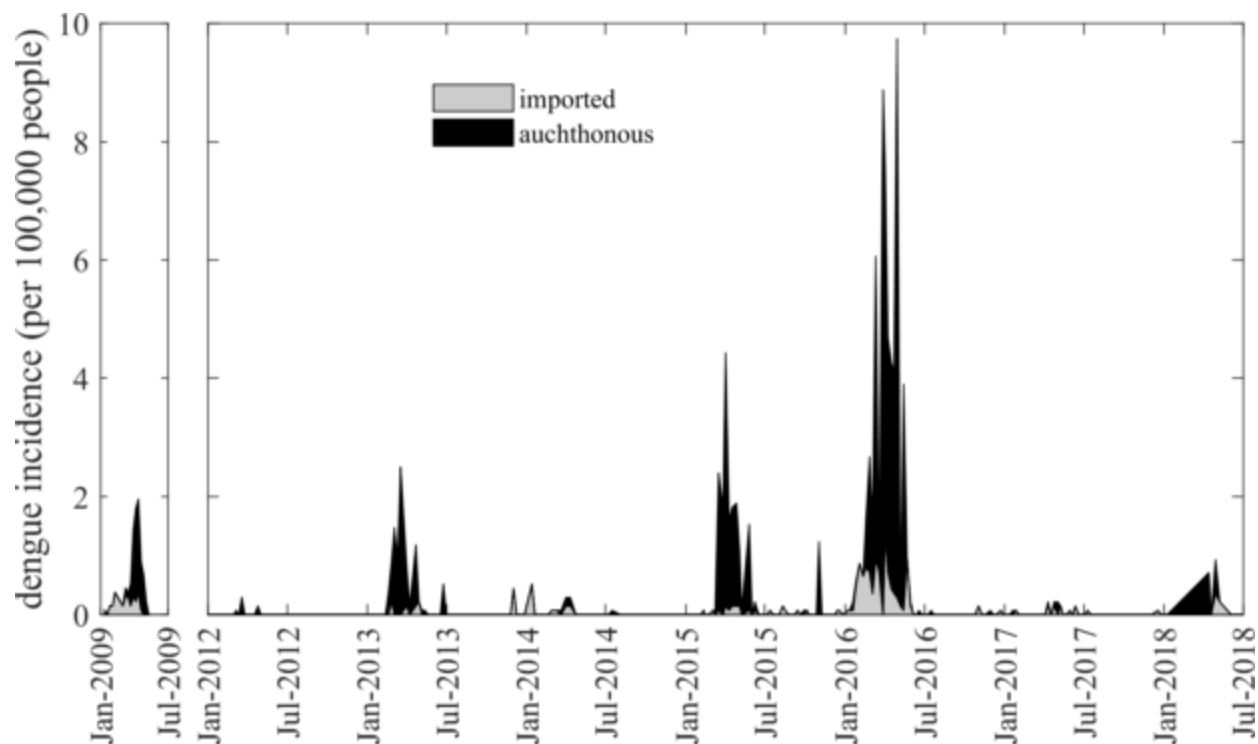

169

170

171 **Figure 2.** Incidence of imported (gray) and autochthonous (black) dengue cases relative to total  
172 incidence each epidemic week between January 2009-July 2018. Incidence is calculated as the  
173 number of cases per 100,000 inhabitants of Córdoba, where yearly population was estimated  
174 using census data from 2001<sup>13</sup>, 2008<sup>14</sup>, and 2010<sup>8</sup>, and linear interpolation. The population size  
175 as estimated by the function  $P(t) = 8045.47t + 1257194.75$  and  $t=0$  is 2001<sup>15</sup>. Note: there was no  
176 reported dengue activity in 2010-2011, so this period has been excluded from the figure.

177

178

179

## 180 References

- 181 1. Gubler DJ, Clark GG. Dengue/dengue hemorrhagic fever: the emergence of a global health  
182 problem. *Emerg Infect Dis*. 1995;1(2):55-57.
- 183 2. WHO. *Dengue: Guidelines for Diagnosis, Treatment, Prevention and Control*. World  
184 Health Organization; 2009.
- 185 3. Vezzani D, Carbajo AE. *Aedes aegypti*, *Aedes albopictus*, and dengue in Argentina: current  
186 knowledge and future directions. *Memórias do Instituto Oswaldo Cruz*. 2008;103(1):66–74.
- 187 4. Aviles G, Rangeón G, Vorndam V, Briones A, Baroni P, Enria D, Sabbatini MS. Dengue  
188 reemergence in Argentina. *Emerging Infectious Diseases*. 1999;5(4):575.
- 189 5. Estallo EL, Carbajo AE, Grech MG, Frías-Céspedes M, López L, Lanfri MA, Ludueña-  
190 Almeida FF, Almirón WR. Spatio-temporal dynamics of dengue 2009 outbreak in Córdoba  
191 City, Argentina. *Acta Tropica*. doi:10.1016/j.actatropica.2014.04.024.
- 192 6. ALMIRÓN WR, ALMEIDA FL. *Aedes aegypti* (Diptera: Culicidae) en Córdoba, Argentina.  
193 *Revista de la Sociedad Entomológica Argentina*. 1998;57(1-4).
- 194 7. Mordecai EA, Cohen JM, Evans MV, Gudapati P, Johnson LR, Lippi CA, Miazgowicz K,  
195 Murdock CC, Rohr JR, Ryan SJ, others. Detecting the impact of temperature on  
196 transmission of Zika, dengue, and chikungunya using mechanistic models. *PLoS Neglected*  
197 *Tropical Diseases*. 2017;11(4):e0005568.
- 198 8. Ministerio de Salud de Nación (MSN). Boletines Epidemiologicos.  
199 <https://www.argentina.gob.ar/salud/epidemiologia/boletinesepidemiologicos>. Accessed  
200 April 28, 2018.
- 201 9. Messina JP, Brady OJ, Scott TW, Zou C, Pigott DM, Duda KA, Bhatt S, Katzelnick L,  
202 Howes RE, Battle KE, Simmons CP, Hay SI. Global spread of dengue virus types: mapping  
203 the 70 year history. *Trends in Microbiology*. 2014;22(3):138-146.  
204 doi:10.1016/j.tim.2013.12.011.
- 205 10. Radke EG, Gregory CJ, Kintziger KW, Sauber-Schatz EK, Hunsperger EA, Gallagher GR,  
206 Barber JM, Biggerstaff BJ, Stanek DR, Tomashek KM. Dengue outbreak in key west,  
207 Florida, USA, 2009. *Emerging infectious diseases*. 2012;18(1):135.
- 208 11. Dengue and dengue vectors in the WHO European region: past, present, and scenarios for  
209 the future - The Lancet Infectious Diseases.  
210 [https://www.thelancet.com/journals/laninf/article/PIIS1473-3099\(14\)70834-5/fulltext](https://www.thelancet.com/journals/laninf/article/PIIS1473-3099(14)70834-5/fulltext).  
211 Accessed February 21, 2019.
- 212 12. Muñoz ÁG, Thomson MC, Goddard L, Aldighieri S. Analyzing climate variations at  
213 multiple timescales can guide Zika virus response measures. *Gigascience*. 2016;5(1):41.

- 214 13. Jaramillo R, Sippy R, et al. Ahead of Print - Effects of Political Instability in Venezuela on  
215 Malaria Resurgence at Ecuador–Peru Border, 2018 - Volume 25, Number 4—April 2019 -  
216 Emerging Infectious Diseases journal - CDC. doi:10.3201/eid2504.181355.
- 217 14. PLAN NACIONAL PARA LA PREVENCIÓN Y CONTROL DEL DENGUE Y LA  
218 FIEBRE AMARILLA. July 2009. [http://www.msal.gob.ar/images/stories/cofesa/2009/acta-](http://www.msal.gob.ar/images/stories/cofesa/2009/acta-02-09/anexo-5-resumen-plan-dengue-02-09.pdf)  
219 [02-09/anexo-5-resumen-plan-dengue-02-09.pdf](http://www.msal.gob.ar/images/stories/cofesa/2009/acta-02-09/anexo-5-resumen-plan-dengue-02-09.pdf). Accessed April 25, 2018.
- 220 15. Dirección general de estadística y censos, Gobierno de la Provincia de Córdoba. Censo  
221 Provincial de Población 2008: Municipio de Córdoba. Censo 08 de Poblacion de la  
222 Provincia Córdoba.

223

224

225

## 226 Supplemental Material

227

228 Table 1. Imported and autochthonous chikungunya and Zika virus cases in Córdoba.

229

| Year | Chikungunya |               | Zika Virus |               |
|------|-------------|---------------|------------|---------------|
|      | Imported    | Autochthonous | Imported   | Autochthonous |
| 2014 | 10          | 0             |            |               |
| 2015 | 4           | 0             |            |               |
| 2016 | 6           | 0             | 4          | 1             |
| 2017 | 2           | 0             | 0          | 0             |
| 2018 | 0           | 0             | 0          | 0             |

230
